# Supplementary material for: Novel one-pot green synthesis of graphene in aqueous medium under microwave irradiation using a regenerative catalyst and the study of its electrochemical properties
Source: Royal Society of Chemistry journal article supplement (doi:10.1039/c4nj01359j), 2014-11-03
Supplement: c4nj01359j1.pdf [file c4nj01359j1.pdf]

## Supporting Information

### Novel one-pot green synthesis of graphene in aqueous medium under microwave irradiation using regenerative catalyst and study of its electrochemical properties

Badrayyana Subramanya and Denthaje Krishna Bhat\*

Department of Chemistry

National Institute of Technology Karnataka, Surathkal, Mangalore-575 025, India.

\*Corresponding author: Tel: +91-824-2473202; Fax: +91-824-74033/2474082

E-mail: [denthajekb@gmail.com](mailto:denthajekb@gmail.com), [kishan@nitk.edu.in](mailto:kishan@nitk.edu.in)

#### Energy Dispersive X-ray (EDX) spectrum of graphene nanosheets

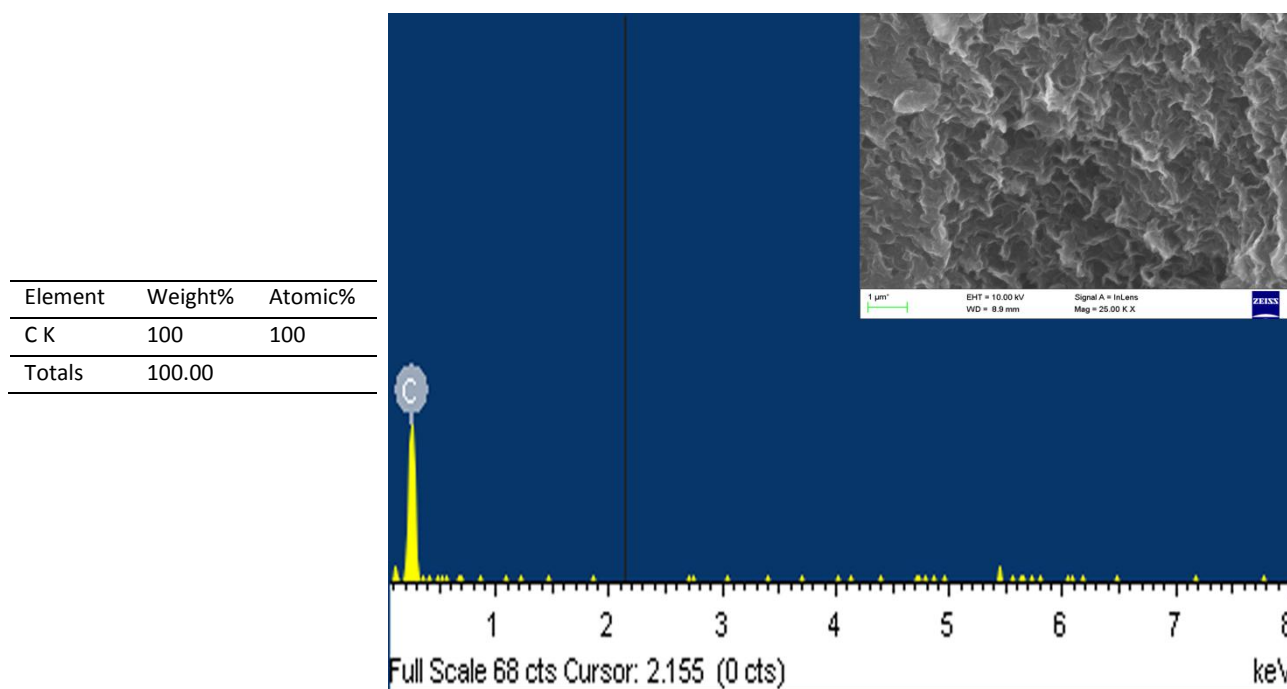

#### Scherrer Equation

The stacking domains whose height ( $L_c$ ) can be determined from the XRD line broadening using Scherrer's equation<sup>1</sup>

$$L_c = \frac{K\lambda}{\beta_c \times \cos \theta}$$

where  $K$  is the shape factor which is equal to 0.89,  $\lambda$  is the wave length of the X-ray radiation,  $\beta_c$  is the full width at half height of symmetrical shape of the diffraction peak and  $\theta$  is the Bragg angle.

The average domain height ( $L_c$ ) was approximately determined to be 0.89 nm. It is known that the thickness of individual single layer graphene is 0.4 nm.<sup>2</sup> This suggests that most of the graphene should exist as bilayered nanosheets.

## References

1. L. Zhang, F. Zhang, X. Yang, G. Long, Y. Wu, T. Zhang, K. Leng, Y. Huang, Y. Ma, A. Yu and Y. Chen, *Sci Rep*, 2013, 3, 1408.
2. A. K. Geim and K. S. Novoselov, *Nat. Mater.*, 2007, 6, 183-191.
